# Supplementary material for: Combinatorial Binding Leads to Diverse Regulatory Responses: Lmd Is a Tissue-Specific Modulator of Mef2 Activity
Source: PLoS Genet. 2010 Jul 1;6(7):e1001014. doi: 10.1371/journal.pgen.1001014 (PMC2895655; doi:10.1371/journal.pgen.1001014)
Supplement: Table S5 — Expression profiling of Lmd direct target genes in Lmd and Mef2 mutant embryos. (0.05 MB XLS) [file pgen.1001014.s008.xls]

## Sheet: Expression of Lmd targets
Expression profiles of all Lmd direct target genes in Lmd or Mef2 mutant embryos
Expression profiles of all Lmd direct target genes differentially expressed in Lmd and / or Mef2 mutant embryos (cutoff: fold change >1.6, q < 1%)
Indicated is the median fold change (in log2) from 4 replicate experiments.
Symbol	FBgn	CG	Synonym	FBgn-INDAC	lmd 5-6 hrs	lmd 6-7 hrs	lmd 7-8 hrs	lmd 8-9 hrs	lmd 9-10 hrs	lmd 10-11 hrs	Mef2 5-6 hrs	Mef2 6-7 hrs	Mef2 7-8 hrs	Mef2 8-9 hrs	Mef2 9-10 hrs	Mef2 10-11 hrs
ab	FBgn0000011	CG4807	ptd,l(2)k02807,clu,parted,clueless,CG4807,clu: clueless, FBgn0013436,FBgn0022233	FBgn0000011	0.374767	0.619202	0.461013	-0.0895822	-0.330312	-0.389466	0.319349	0.586947	0.164118	0.128153	0.0874883	-0.448824
Act57B	FBgn0000044	CG10067	act 57A,act57A,Act57A,anon-EST:CL2c12,Actin,BEST:RE38067,C: Group C,actin,CG10067,CG30294,M: M repeat,T10, FBgn0019861,FBgn0050294,FBgn0065030	FBgn0000044	-0.895966	-0.593686	-0.750253	-0.965744	-1.10816	-0.253979	-0.126849	-1.32265	-1.1278	-1.35626	-1.94057	-1.461
Act87E	FBgn0000046	CG18290	E,Actin,CG18290,act 87E,mus87E,actin,act87E, FBgn0038154	FBgn0000046	-0.193171	-0.123788	0.0329511	-0.799778	-0.731415	-0.171225	-0.0672506	-0.285057	-0.263769	-0.355527	-1.04777	-0.694042
aop	FBgn0000097		CG3166 ;CG3166 ;yan: yan ;pok: pokkuri ;pokkuri ;yan/pok ;Aop ;Yan ;aop/yan ;DROYANET ;DROYANETSB ;SK2-1 ;Aop/Yan ;YAN ;pok ;, FBgn0003123	FBgn0000097	0.638503	-0.00330131	-0.368521	-0.233276	-0.137025	-0.698872	1.54818	1.112	0.624971	0.749192	1.6123	-0.157437
Dll	FBgn0000157	CG3629	Brista,E(Arp): Enhancer of Arp,Distalless,Ba,Art,Ba: Brista,dll,BcDNA:LP01770,l(2)387,Enhancer of Arp,2.7,Distal-less,En(Arp),l(2)01092,CG3629, FBgn0010474,FBgn0026807,FBgn0063133	FBgn0000157	0.214036	0.120314	-0.0979203	0.0550056	0.144252	-0.0660101	0.472241	0.0763851	-0.0437381	0.161072	0.845817	-0.156996
by	FBgn0000244		CG9379 ;CG9379 ;CG9379 ;3R-B ;CT26639 ;tensin ;BcDNA:RE65113 ;, FBgn0021752	FBgn0000244	-0.0475051	-0.0133326	0.146324	0.0171212	0.0220172	-0.0066248		0.132353	0.0408049	0.107234	0.0281982	-0.0595051
chic	FBgn0000308	CG9553	CG9553 ;CG9553 ;sand ;stranded ;D88 ;l(2)27/7 ;profilin ;Profilin ;chi ;Chic ;Chi ;chickadee ;, FBgn0013731	FBgn0000308	0.0178585	-0.131876	0.0652986	-0.212476	-0.428403	-0.466552	-0.133077	0.0426543	-0.117929	-0.0539022	-0.178831	-0.113888
hth	FBgn0001235	CG17117	dorsotonals,l(3)05745,1323/07,dtl,Gene II,Meis1,l(3)86Ca,Dm-HTH,P53,clone 2.13,hth1,hth2,CG17117,Hth,anon-EST:Liang-2.13,1422/04, FBgn0010875,FBgn0011583,FBgn0015762,FBgn0016022,FBgn0025968	FBgn0001235	-0.0105111	-0.0615957	-0.00454859	0.0160099	0.0513356	-0.103142	0.376474	0.279484	0.0142222	0.0760471	0.521631	-0.283103
HLHm3	FBgn0002609	CG8346	CG8346,HLH-m3,E(spl)m3,m3,E(Spl)-HLH-m3,E(spl)m3/m4,E(spl)M3,split locus enhancer protein m3,HLHM3, FBgn0010046	FBgn0002609	0.885189	0.95059	0.502936	-0.0911667	-0.246395	-0.28459	1.49263	0.929383	0.532753	0.215281	-0.0358365	-0.371412
mam	FBgn0002643	CG8118	Dm0064,Mam,mam(CAG)[[7]],dMam,l(2)04615,N-2G,SR2-4,CG8118,l(2)03505, FBgn0010581,FBgn0026797	FBgn0002643	0.153094	0.0807853	0.116773	0.198258	0.356572	0.00595562	0.00810729	0.0461645	0.0101357	0.237246	0.287675	-0.185005
malpha	FBgn0002732	CG8337	E(spl)malpha,E(spl)ma,CG8337,	FBgn0002732	-0.338489	-0.536482	-0.162729	-0.492184	-0.586988	-0.444069	-0.0936392	-0.000936	0.00763862	-0.0851198	-0.249082	-0.0796827
HLHmgamma	FBgn0002735	CG8333	E(spl)mB,E(Spl) HLH-m gamma,CG8333,Mgamma,E(spl)-mgamma,HLHmB: Enhancer of split region transcript HLHmB,mB,anon-EST:Liang-1.49,split locus enhancer protein mB,E(spl) m gamma,Dm-mB,Enhancer of split mgamma,E(spl)gamma,HLH-mgamma,Enhancer of split region transcript HLHmB,mgamma,e(spl)mgamma,E(spl)mgamma,E(spl)Mgamma,E(spl) mgamma,clone 1.49,	FBgn0002735	-0.19801	-0.507833	-0.537935	-0.669023	-1.00626	-0.798066	0.266522	0.164202	0.126686	-0.299939	0.000396	-0.175863
ninaD	FBgn0002939		CG5750 ;CG31783 ;CG5750 ;CG5750 ;CG5750 ;, FBgn0032662	FBgn0002939	-0.0121572	0.119551	-0.185282	-0.55144	-0.471393	-1.06566	0.101443	0.371384	0.092101	0.227653	-0.108218	-0.200367
pnr	FBgn0003117	CG3978	Pnr,GATAa,prn,pannier,CG3978,l(3)89B3,dGATAa/pannier,dGATAa,GATA,GATAa/Pannier, FBgn0038393	FBgn0003117	-0.000404	0.128578	0.104916	-0.0809111	-0.115106	-0.0422158	0.203717	0.182932	0.0791296	-0.0185961	0.109496	0.0152095
prd	FBgn0003145	CG6716	CG6716,Prd,pr,	FBgn0003145	-0.317711	-0.0765113	0.0121907	-0.101028	-0.0704328	-0.061346	0.156884	-0.0116619	0.149403	0.376994	-0.0714333	-0.0722151
rib	FBgn0003254	CG7230	CG7230 ;CG7230 ;CG7230 ;CG7230 ;gene 5 ;, FBgn0034424	FBgn0003254	-0.0395788	0.0669134	0.526003	0.0491601	-0.643569	-0.291209	-0.0524066	0.391906	0.198297	0.409117	-0.757623	-0.159929
svp	FBgn0003651	CG11502	l(3)j2E2,l(3)rA028,0106/18,SEVEN-UP,BcDNA:GH08189,0114/20,down-and-out,0861/07,l(3)07842,l(3)rL069,0598/01,Svp,l(3)ck16,CG18158,don,l(3)87Bd,0351/01,0005/12,seven-up,CG11502,complementation group 7,NR2F3,ck16,0042/01,SVP, FBgn0011337,FBgn0011492,FBgn0011510,FBgn0038010,FBgn0063263	FBgn0003651	-0.0697061	0.0659191	0.0599004	-0.012113	-0.0161781	0.000923	-0.0985511	-0.024304	-0.0161531	-0.00861198	-0.0607842	-0.0580641
Tm1	FBgn0003721	CG4898	BcDNA:GH09289,tropomysin II,1305/10,2299,Tmr33,TnH-34,Tmr34,BcDNA:LD37158,cytoskeletal Tropomyosin,cytoplasmic tropomyosin,PmI,Troponin H,tropomyosin II,cTmII,tmII,cTM,Tropomyosin-1,TnH,BcDNA:SD21996,region 3,tropomyosinII,TMII,Tropomyosin II,l(3)S130510,Tm,TmII,cTm,Tropomyosin,mTmII,CG4898,l(3)s2958,tropomyosin,l(3)02299, FBgn0010776,FBgn0011036,FBgn0015832,FBgn0015833,FBgn0046771,FBgn0046800,FB…	FBgn0003721	0.00761926	0.0107095	0.0711506	0.0711589	0.105963	0.19898	0.0647297	0.023387	0.0831788	-0.0162744	0.0609005	-0.0286072
tsh	FBgn0003866	CG1374	ae[l],l(2)04319,ae,l(2)B4-2-12,T shirt,aeroplane,CG1374, FBgn0000058,FBgn0010570,FBgn0013543	FBgn0003866	0.233817	0.108936	0.139589	0.265556	0.0769838	0.179851	0.0968863	0.197985	0.0116375	0.270101	-0.160115	-0.209187
ttk	FBgn0003870	CG1856	CG11558 ;CG1856 ;CG11558 ;CG1856 ;CG1856 ;oss ;oversensitive ;osn ;ttk/FTZ-F2 ;FTZ-F2 ;Ttk ;E(yan)100D ;Enhancer of yan at 100D ;schmal ;0037/17 ;0250/25 ;0438/31 ;0702/07 ;1049/07 ;1119/04 ;1184/16 ;1209/05 ;1209/10 ;1260/10 ;1281/04 ;1325/15 ;1372/08 ;1396/14 ;1418/06 ;3540 ;5125 ;5311 ;clone 2.9 ;Ttk69 ;ftzf2/ttk ;tramtrack69 ;TTK88 ;ttk69 ;ttkp69 ;Tramtrack69 ;twk ;tramtrak ;tramtrack-69 ;ano…	FBgn0003870	0.11095	0.26461	-0.0982818	-0.107999	-0.0284533	-0.155837	0.0283611	0.526613	0.17128	0.0591167	0.872104	0.513124
betaTub60D	FBgn0003888	CG3401	beta3-tubulin,Dmbeta3,betaTub3,tubulin,beta60C,beta-Tub6D,DTB3,60C beta tubulin,T,p50,beta3-Tub,beta3 tubulin,3t,beta-3tubulin,beta tubulin,beta3,beta 3 tubulin,p50/tubulin,beta-tub,beta3-Tubulin,D.m.BETA-60D,betaTub60C,betaTub60D,beta3 TU,beta-Tubulin,Beta tubulin,beta[[3]] tubulin,beta3t,B3-tubulin,CG3401,Beta3 tubulin,tubulin b-3,beta3t: beta3 tubulin,beta3tubulin,p53,p53/tubulin,beta[[3]]-Tub…	FBgn0003888	-0.40895	0.238904	-0.129787	-0.528876	-0.429077	-1.29861	-0.0142464	-0.116696	-0.221987	-0.504671	-0.226419	-0.420095
blow	FBgn0004133	CG1363	l(2)43Eb,CG1363,	FBgn0004133	-0.0307329	-0.18045	-0.0514714	-0.886755	-0.507678	-0.558511	-0.0917119	-0.110443	-0.184015	0.365405	-0.184493	-0.17456
18w	FBgn0004364	CG8896	toll,wheeler,18-wheeler,Toll like receptor,CG8896,18-Wheeler,l(2)00053,18 Wheeler,CT25100,tlr,18W,	FBgn0004364	0.0740325	0.0286161	0.137416	-0.0990663	-0.0390435	-0.14759	0.497416	0.445838	0.119006	0.289286	0.633091	-0.143772
RpS26	FBgn0004413	CG10305	l(2)04553,rpS26,CG10305,anon-EST:fe2A3,anon-fast-evolving-2A3,rpS31,ribosomal protein S31., FBgn0003280,FBgn0004088,FBgn0011775,FBgn0025235	FBgn0004413	-0.307269	-0.437732	0.597946	-0.0925509	-0.58206	-0.618013	-0.138486	-0.1188	0.0331475	0.513852	-0.499445	-0.545027
gol	FBgn0004919	CG2679	meso,CG2679,anon-G1,g1,goliath, FBgn0004375,FBgn0004899	FBgn0004919	-0.308077	-0.0380454	-0.575724	-1.04782	-0.917205	-0.881563	0.401842	0.565166	0.304372	0.219015	0.0566595	0.764845
lola	FBgn0005630	CG12052	sw59,CG18381,BtbIV,CG30012,BTB-IV,LD03274,BEST:LD03274,BcDNA:LD17006,CG18376,longitudinals absent,l(2)00642,BcDNA:RH31485,misguided,CG30013,CG18379,l(2)s3697,CG18378,bs06a08.y1,CG30014,BTB-protein-IV,CG18380,CG12052,NEST:bs06a08, FBgn0010468,FBgn0010691,FBgn0012046,FBgn0020247,FBgn0026589,FBgn0033530,FBgn0033531,FBgn0033532,FBgn0033533,FBgn0033534,FBgn0033535,FBgn0045396,FBgn0050012,FBgn0050013,F…	FBgn0005630	0.0994963	-0.0305112	0.199414	-0.234737	-0.359366	-0.700041	0.0344655	-0.117548	0.626923	0.676791	0.0432301	-0.27688
lbl	FBgn0008651	CG6570	CG6570 ;nkch4 ;NK-cluster homeobox 4 ;lady-bird-late ;ladybird ;lb ;Lb ;Ladybird ;NK? ;NKch4 ;ladybird late ;,	FBgn0008651	0.106925	0.201328	0.0685336	0.246658	0.220455	0.0760305	0.121579	0.276566	0.0907212	0.176332	0.175031	-0.031507
Uch	FBgn0010288	CG4265	ubiquitin carboxyl terminal hydrolase,uch-D,CG4265,UBL,uch,UCH,UCH-D,	FBgn0010288	-1.20429	-1.10694	-0.774916	-0.319546	-0.285138	-0.097123	0.135655	0.0540833	0.0985799	-0.103656	0.187026	0.262314
Rya-r44F	FBgn0011286	CG10844	l(2)k04913,l(2)k00424,RyR,dya,Rya-r76CD,dry,ryr,CG10844,DRY,ryanodine receptor,RYR,Ryr,DRR, FBgn0010268,FBgn0022194	FBgn0011286	-0.0422592	-0.0285835	0.00734265	-0.0651989	-0.0233359	-0.0286476	0.00995448	-0.154039	0.0643358	0.0442743	-0.0142984	0.0287793
Mef2	FBgn0011656	CG1429	DMEF2,MEF2#,D-MEF2,MEF2,C: Group C,DMEF-2,DMedf2,D-mef2,BEST:SD04091,Complementation group C,mef-2,D-Mef2,DMef-2,Dmef-2,Myocyte-specific enhancer factor 2,Group C,CG1429,dMEF2,Dmef,dMef2,mef,l(2)46CFr,DMef2,Mef,mef2,dmef2,SD04091,Dmef2,MEF-2,22.21, FBgn0010437,FBgn0019710,FBgn0047353	FBgn0011656	-0.551973	0.0134364	-0.111385	-0.846998	-0.665391	-0.87945	0.179475	0.658037	0.680697	0.537825	0.25953	0.944509
Dp	FBgn0011763	CG4654	dDp,dDP,l(2)vr10,DmDP,vr10,dDP1,CG4654,DP,DP1,l(2)49Fk,lethal(2)49Fk,49Fk, FBgn0002082	FBgn0011763	0.325938	-0.0718425	0.123505	-0.317017	-0.484586	-0.400862	0.13852	-0.0325675	0.239527	0.594954	-0.135107	-0.396511
Dsp1	FBgn0011764	CG12223	Structure specific recognition protein 2,Ssrp2,CG12223,Dorsal switch protein 1,DSP1,Hmg14D,ssrp2,dsp1, FBgn0015237,FBgn0015301	FBgn0011764	-0.4386	-0.211117	-0.370704	-0.815155	-0.963706	-1.14833	0.244043	0.612091	0.337518	0.236676	0.0900316	-0.134479
shot	FBgn0013733	CG18076	CG18076 ;CG18637 ;CG18076 ;CG18076 ;CG18076 ;l(2)k04204 ;l(2)k05434 ;l(2)k05821 ;l(2)k10821 ;groovin ;grv ;kak ;kakapo ;Grv ;42/4 ;kop ;kopupu ;l(2)k03010 ;Kakapo ;Shot ;shortstop/kakapo ;short-stop ;kakapoo ;shortstop ;l(2)CA4 ;l(2)k15606 ;short stop ;, FBgn0014183	FBgn0013733	-0.189062	-0.202805	-0.0595556	-0.0699871	0.0921555	-0.165021	0.00847634	0.00800119	0.0342996	-0.0878249	-0.181402	-0.0990803
cnn	FBgn0013765	CG4832	Cnn: Centrosomin,Centrosomin,maternal effect syncytial blastoderm arrest C,obv: oblivious,mat(2)synHK21,CNN,CG4832,oblivious,CG18370,obv,Cnn,mfs,mat(2)syn-C, FBgn0002675,FBgn0020264,FBgn0033839	FBgn0013765	-0.0207321	-0.394726	-0.751917	-0.524695	-0.487468	-0.437591	-0.548076	-0.333501	-0.42486	-0.488398	-0.625696	-0.188309
Pak	FBgn0014001		CG10295 ;CG10295 ;p65<up>PAK</up> ;DPAK ;p21-associated kinase ;PAK ;PAK1 ;D-Pak ;pak ;Dpak1 ;PAK2 ;dPAK1 ;DPak ;dpak ;PaK ;Pak1 ;dPak ;Pak1 kinase ;Dpak ;pak1 ;DmPAK1 ;, FBgn0037437	FBgn0014001	-0.0687421	0.0475757	0.0333306	0.00238724	-0.0476433	-0.118661	0.0151394	0.126493	0.108819	0.0225055	-0.166827	-0.0789549
csul	FBgn0015925	CG3730	capsuleen,Drosophila arginine methyltransferase 5,CG3730,JBP1,DART5, FBgn0028723	FBgn0015925	-0.128205	-0.340684	-0.401322	-0.28482	-0.516301	-0.281447	-0.0332451	-0.168113	-0.200776	-0.0797027	-0.154429	0.303658
sns	FBgn0024189	CG33141	rost,CG13752,CT33232,CG12495,CT33230,CG13753,CG18464,sns20,CG13755,SNS,43-49,CG8278,CG13754,sticks and stones,CG33141,CG2385, FBgn0026614,FBgn0033331,FBgn0033332,FBgn0033333,FBgn0033334,FBgn0033335,FBgn0033336,FBgn0040776,FBgn0042193,FBgn0053141	FBgn0024189	0.0274622	0.10747	0.0828767	-0.0157841	0.039261	-0.0653038	0.138189	0.283372	-0.0548086	0.121093	0.153446	-0.0412235
Srp54	FBgn0024285	CG4602	SRp54,anon-EST:Liang-2.16,clone 2.16,dSRp54,CG4602,p75, FBgn0025965	FBgn0024285	-0.565886	-0.53082	-0.079521	-0.460944	-0.860037	-0.57479	-0.0558322	-0.16553	0.588268	1.07285	-0.475685	-0.145479
Pfrx	FBgn0027621	CG3400	fructose 2,phosphofructokinase,6 bisphosphatase,CG3400,	FBgn0027621	0.515549	0.360406	0.538696	0.506181	0.501921	0.245728	0.0877696	0.130737	-0.194591	-0.121811	0.287624	0.170746
CG12203	FBgn0031021	CG12203	,	FBgn0031021	-0.598982	-0.129673	0.371134	-0.113759	-0.422087	-0.1432	-0.339851	-0.123015	-0.324826	-0.29096	-0.990549	-0.369157
CG5080	FBgn0031313	CG5080	CT16297,	FBgn0031313	-0.104265	0.0712497	0.125232	0.083454	-0.3193	-0.512544	-0.0109103	-0.00629601	0.0321747	-0.151297	-0.95141	-0.930644
jp	FBgn0032129	CG4405	CG13115,CG4405,JP, FBgn0032128	FBgn0032129	0.0216052	-0.017732	-0.0155334	-0.103062	-0.0629704	-0.0662051	-0.0233843	-0.00961071	0.0389193	-0.0480722	-0.103653	-0.0473515
CG14757	FBgn0033274	CG14757	,	FBgn0033274	0.959302	0.547993	0.360037	0.425711	0.202002	0.214283	0.0239048	-0.237241	0.119127	-0.201623	-0.251733	-0.354223
CG11825	FBgn0033519	CG11825	BcDNA:RE25483, FBgn0063044	FBgn0033519	1.52858	-1.66428	-0.994773	-1.3572	-1.69475	-1.03902	2.57904	-1.18381	-1.17669	-0.531454	1.14103	0.54834
CG16728	FBgn0033539	CG16728	CT37209,	FBgn0033539	0.191839	-0.276047	-0.404699	-0.265388	-0.369479	-0.375341	-0.254435	-0.373763	-0.489986	-0.55014	-0.661127	-0.440077
tou	FBgn0033636	CG10897	Dm Tou,toutatis,VI,EP0622,EP622,transcript group VI,anon-48Ad,gene VI,CG10897,EP(2)0622, FBgn0015875,FBgn0043382	FBgn0033636	-0.0256896	0.0118276	0.172419	0.026097	0.159877	0.175081	0.198988	0.435685	0.106432	0.100787	0.276077	0.0933251
CG9005	FBgn0033638		BcDNA:GH05710, FBgn0063271	FBgn0033638	-0.0909006	-0.0445818	-0.0186368	0.0482054	0.00369635	-0.0628876	0.0548687	0.135355	0.0760113	0.207198	0.112621	0.263695
sug	FBgn0033782	CG3850	sugarbabe,CG3850,	FBgn0033782	-0.117967	-0.0395235	0.0416533	-0.55287	-0.970583	-0.90969	0.352897	0.158244	0.217883	0.859387	0.151775	-0.0804883
CG4984	FBgn0034267	CG4984	,	FBgn0034267	0.239158	0.080365	-0.0163514	0.173249	0.0928918	0.0509057	-0.0683766	-0.26874	-0.104454	-0.524229	-0.147039	-0.0637051
CG9416	FBgn0034438	CG9416	,	FBgn0034438	0.0486419	0.702363	0.645885	1.09079	0.659674	0.985382	0.312265	0.260272	0.295629	-0.0025902	-0.693541	-0.564386
Glycogenin	FBgn0034603	CG9480	Glycogenin,NEST:bs16a02,FBgn0034603,CG9480, FBgn0045283	FBgn0034603	-0.205248	0.0294613	-0.0539468	-0.528305	-0.29572	-0.851702	0.0295984	-0.102689	-0.333547	-0.389311	-0.244452	-0.111692
asrij	FBgn0034793	CG13533	CG13533 ;Dmasrij ;asrij ;,	FBgn0034793	-0.0789287	-0.122765	0.166297	-0.0891056	-0.150901	-0.255825	0.2524	-0.0304243	0.386078	0.80631	0.45873	-0.0257457
Tina-1	FBgn0035083	CG2803	Troponin C-akin-1,BEST:GM14784,CG2803, FBgn0040500	FBgn0035083	-0.298662	-0.0339288	-0.115257	0.0865972	-0.179639	-0.23212	0.0448846	-0.16927	-0.0492924	-0.153248	-0.351325	-0.29845
CG17181	FBgn0035144	CG17181	,	FBgn0035144	-0.244247	0.713624	0.388033	-1.03139	-1.09245	-0.849427	0.307302	0.749554	0.710109	1.02486	0.384543	-0.231408
CG1074	FBgn0037250	CG1074	anon-WO0118547.308, FBgn0062105	FBgn0037250	-0.0450228	0.0598192	-0.0454844	-0.248467	-0.524469	-0.420195	-0.143663	-0.114694	-0.0642292	-0.215286	-0.122461	-0.100199
Hph	FBgn0037308	CG31543	hph,HIF-1a prolyl hyroxylase,HIF prolyl hydroxylase,CG31543,anon-EST:Posey69,fga,CG1114,l(3)02255,dmHPH,HIF prolyl 4-hydroxylase,fatiga,Dm.egl-9,CG14665, FBgn0010773,FBgn0027674,FBgn0037306,FBgn0051543	FBgn0037308	0.0272064	-0.168318	0.0412583	-0.0292222	-0.072957	0.0445982	0.0864223	-0.0265386	0.0868212	0.092417	0.0729307	0.105898
CG11033	FBgn0037659	CG11033	,	FBgn0037659	0.0684643	0.451681	0.421799	0.365697	0.528837	0.596477	0.0643285	0.170828	-0.0301069	-0.122557	0.267525	-0.000552
CG14687	FBgn0037835	CG14687	BcDNA:RE74890, FBgn0062973	FBgn0037835	0.583759	0.763358	-0.310679	-0.954045	-0.903271	-1.29922	0.773736	0.435697	-0.168333	-0.0613192	0.507078	0.547517
mthl5	FBgn0037960	CG6965	anon-WO0170980.71,mth-like 5,anon-WO0170980.70,Mth-like 5,CG6965, FBgn0046513,FBgn0046514	FBgn0037960	0.438309	0.433926	0.171027	0.000355	-0.258748	-0.203055	-0.0112655	0.131909	0.0149647	-0.0316961	-0.527472	0.000907
lmd	FBgn0039039	CG4677	Lmd,minc,myoblasts incompetent,gleeful,gfl,K,CG4677,anon-EST:CL2d4, FBgn0019860	FBgn0039039	-0.0481722	0.791963	0.316949	-0.310012	-0.290617	-0.401288	0.240316	0.766405	0.0871036	-0.176364	-0.21017	0.0745947
CG13838	FBgn0039041	CG13838	,	FBgn0039041	-0.0458633	0.103776	-0.162415	-0.572306	-0.677022	-1.12783	0.0410309	0.0450999	-0.00603646	-0.0746986	0.0108893	0.161437
jing	FBgn0041145	CG9403	rhumba,CG9403,l(2)22F3,l(2)01094, FBgn0010475,FBgn0026656,FBgn0033077	FBgn0041145	-0.108197	-0.00641498	0.0527371	0.0258939	-0.042483	0.0103647
Pax	FBgn0041789	CG31794	CG18576,DPxn,Paxillin-derived LIM-only protein,paxillin,Paxillin,CT42454,Dpax,PDLP,paxillin-derived LIM-only protein,CT40481,CG18061,DPaxillin,CG31794,DPxn37, FBgn0032776,FBgn0032777,FBgn0051794	FBgn0041789	-0.197809	0.312867	0.0601832	0.408214	0.385664	0.436015	0.163172	0.232105	0.225186	0.184709	-0.047947	0.116549
CG18854	FBgn0042174		CG13122 ;CG13122 ;CG13122 ;, FBgn0032148	FBgn0042174	0.886826	0.755397	0.48643	0.397051	0.0570957	0.365718	0.128346	0.126876	-0.125135	0.251578	0.037522	0.236493
MESK2	FBgn0043070	CG15669	CG15668,BcDNA:RH10174,BcDNA:LD27504,BcDNA:GH12032,l(2)01467,CG15669,Misexpression suppressor of KSR 2, FBgn0010491,FBgn0034632,FBgn0034633,FBgn0046775,FBgn0047042,FBgn0064967	FBgn0043070	-0.00653652	0.00132741	-0.0356011	-0.0210758	0.00892488	-0.0663316	-0.00537565	-0.101788	0.0161099	0.0221138	0.036561	-0.0609215
dome	FBgn0043903	CG14226	l(1)G0218,l(1)G0405,mom,l(1)G0264,l(1)G0441,CG14226,l(1)G0282,l(1)G0468,DOME,verstopft,l(1)G0321,anon-18DEb,CT33841,domeless,master of marelle,Dome,l(1)G0367,vsp,l(1)G0217, FBgn0019901,FBgn0027236,FBgn0028267,FBgn0028288,FBgn0028311,FBgn0028326,FBgn0028335,FBgn0028344,FBgn0031056	FBgn0043903	-0.107587	-0.114378	-0.0727685	-0.0600924	0.021631	0.0254657	-0.0439645	0.0389083	-0.0721212	-0.223431	-0.125385	0.0425962
CG30035	FBgn0050035	CG30035	CG7797,CG7801, FBgn0033642,FBgn0033643	FBgn0050035	1.00123	0.52797	-0.232809	0.272934	-0.135196	-0.14995	0.20341	0.20951	-0.170022	-0.612649	-1.00139	-0.796265
CG30349	FBgn0050349	CG30349	CG13750,CG2396, FBgn0033343,FBgn0033345,FBgn0063640	FBgn0050349	0.265716	0.058497	0.0619272	0.0756502	-0.0312974	0.0498085	-0.0381716	0.0141407	-0.0247983	0.0875902	-0.117273	-0.163148
CG31038	FBgn0051038	CG31038	CG15512 ;CG7854 ;, FBgn0039716	FBgn0051038	-0.0305183	-0.0346083	-0.0223372	-0.0958212	0.0499499	-0.0777538	-0.0230733	0.0690756	0.0311252	-0.146779	-0.0413851	0.128985
CG32982	FBgn0052982	CG32982	CG9585,CG18566,CG9584, FBgn0032097,FBgn0032098,FBgn0032099	FBgn0052982	0.0248678	-0.0076648	-0.199114	0.0170089	0.118301	0.190546	-0.000185	-0.142128	-0.0637253	-0.0110684	0.192719	0.221232
mbl	FBgn0053197	CG33197	l(2)k05507,Muscleblind,CG33197,l(2)k01212,mindmelt,mm,n(2)k07110,l(2)01038,CG10941,CG14477, FBgn0010471,FBgn0015514,FBgn0020274,FBgn0022250,FBgn0034208	FBgn0053197	-0.0310244	0.161104	-0.237333	-0.0721515	-0.114409	-0.485871	0.258124	0.0134015	-0.143652	-0.325063	-0.219637	-0.278822
tal	FBgn0087003		CR33327 ;BcDNA:LD11162 ;putative noncoding RNA 001:3R ;, FBgn0047214	FBgn0053327	-0.237813	-0.0946195	0.177478	0.828092	0.774465	0.550647	0.0960784	-0.139347	0.12302	0.590245	0.543406	0.452545
